# Supplementary material
Source: ML conference proceedings conference paper supplement (https://openreview.net/forum?id=7k7cubl1iL)

## 1 A Discussion on the Pharmaceutical Terminology

2 In this work, we employ a comprehensive set of evaluation metrics—**Vina**, **QED**, **SA**, our pro-  
3 posed **MRR**, the **Success Ratio**, and **QikProp**—to analyze different facets of molecular generation  
4 performance. Following established practices, we use Vina scores to assess the 3D complementarity  
5 between generated molecules and their target binding sites. Meanwhile, we evaluate broader  
6 molecular properties using standard metrics (QED and SA), the domain-informed MRR, and physico-  
7 chemical and pharmacokinetic descriptors from QikProp, which are widely used in computer-aided  
8 drug design (CADD).

9 To clarify the key concepts underpinning our evaluation framework, we distinguish among **drug**  
10 **potential**, **drug-likeness**, **molecular reasonability**, and **chemical validity**.

11 Previous studies have often focused too narrowly on geometric complementarity, overlooking other  
12 essential requirements a drug-like molecule must fulfill. We introduce the term *drug potential* to  
13 describe the overall suitability of a molecule as a drug candidate, encompassing not only binding  
14 affinity but also synthetic accessibility, chemical stability, pharmacokinetics (absorption, distribution,  
15 metabolism, and excretion), and safety. These properties are intrinsically determined by molecular  
16 structure and collectively influence whether a molecule can reach its intended biological target and  
17 survive the drug development process.

18 The term *drug-likeness* is widely used in medicinal chemistry to reflect the multidimensional suitabil-  
19 ity of a molecule as a drug candidate. Drug discovery and development (DDD), however, are deeply  
20 influenced by human expertise—including implicit preferences for molecular scaffolds and nuanced,  
21 often tacit, domain knowledge that is difficult to formalize or quantify. As a result, even experienced  
22 medicinal chemists struggle to define or approximate the true probability function  $p(\text{drug})$ , which  
23 represents the likelihood that a molecule will become a viable therapeutic candidate. However, the  
24 machine learning community often oversimplifies *drug-likeness* to metrics such as QED or Lipinski’s  
25 Rule of Five, which capture only a narrow range of basic physicochemical properties. This simplifi-  
26 cation overlooks critical factors such as oral bioavailability, metabolic stability, and toxicity risks  
27 (e.g., hERG liability).

28 At a more fundamental level, a molecule must be *chemically valid*, meaning it adheres to basic  
29 chemical rules such as proper valence and atom types. However, we observe that many model-  
30 generated molecules—while technically valid—contain rare or unstable structural substructures that  
31 would be flagged by human medicinal chemists. These structures are neither common nor practically  
32 accessible and thus fall outside the bounds of what is typically accepted in pharmaceutical research.  
33 Despite the central importance of this distinction, prior work has not proposed an effective metric to  
34 differentiate between chemically plausible structures and those that are formally valid but unrealistic.  
35 To fill this gap, we propose MRR, a rule-based metric that reflects medicinal chemistry heuristics. It  
36 identifies implausible features such as unstable ring systems and uncommon conjugation patterns,  
37 offering an interpretable and practical means of identifying unrealistic model outputs.

38 By explicitly defining these concepts and introducing MRR, we aim to guide molecular generation  
39 efforts toward pharmaceutically meaningful directions, bridging the gap between computational  
40 outputs and real-world drug development feasibility.

## 41 B Limitations

42 One limitation of CIDD is its dependence on pretrained LLMs, which may occasionally introduce  
43 hallucinations in underexplored chemical regions.

## 44 C Detailed Prompts and Responses for LEDD

45 In this section, we present the detailed workflow of the CIDD framework, including the prompts and  
46 example responses for each module.

47 Figure 1 illustrates the complete drug design pipeline. The Interaction Module first identifies key  
48 fragments within the supporting molecule that interact with the protein pocket. This information is  
49 then utilized by the Design Module, which devises strategies to replace uncommon or unfavorable  
50 fragments while preserving crucial interactions. Once a new molecule is designed, the Evaluation

51 Phase within the Design Module assesses its viability. Finally, the Reflection Module analyzes the  
 52 design process and outcomes, highlighting both strengths and areas for improvement.  
 53 Figure 2 presents the prompt and example response for the Interaction Analysis Module.  
 54 Figures 3 and 4 display the prompt and example response for the Design Module.  
 55 Figures 5, 6, and 7 illustrate the prompt and example responses for the Reflection Module.  
 56 Figures 8 and 9 show the prompt and example response for the Selection Module.

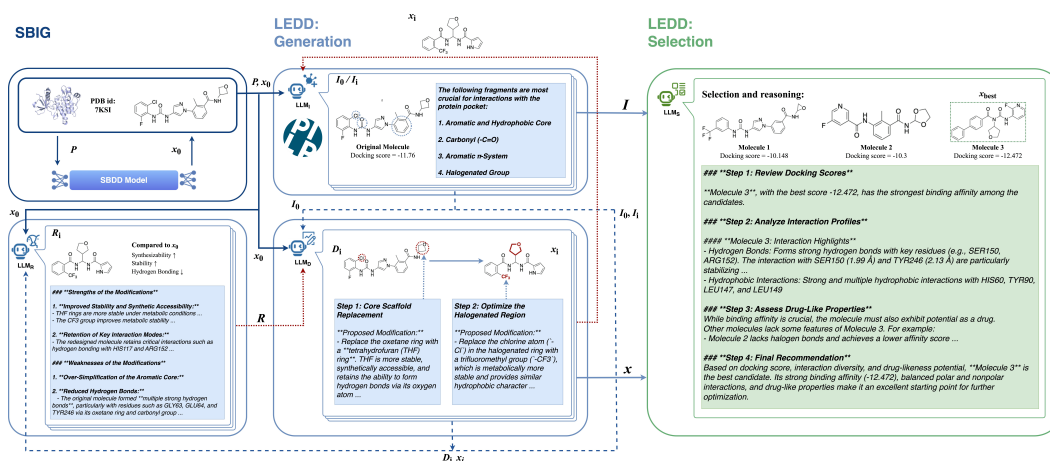

Figure 1: Workflow of CIDD framework



## Interaction analysis

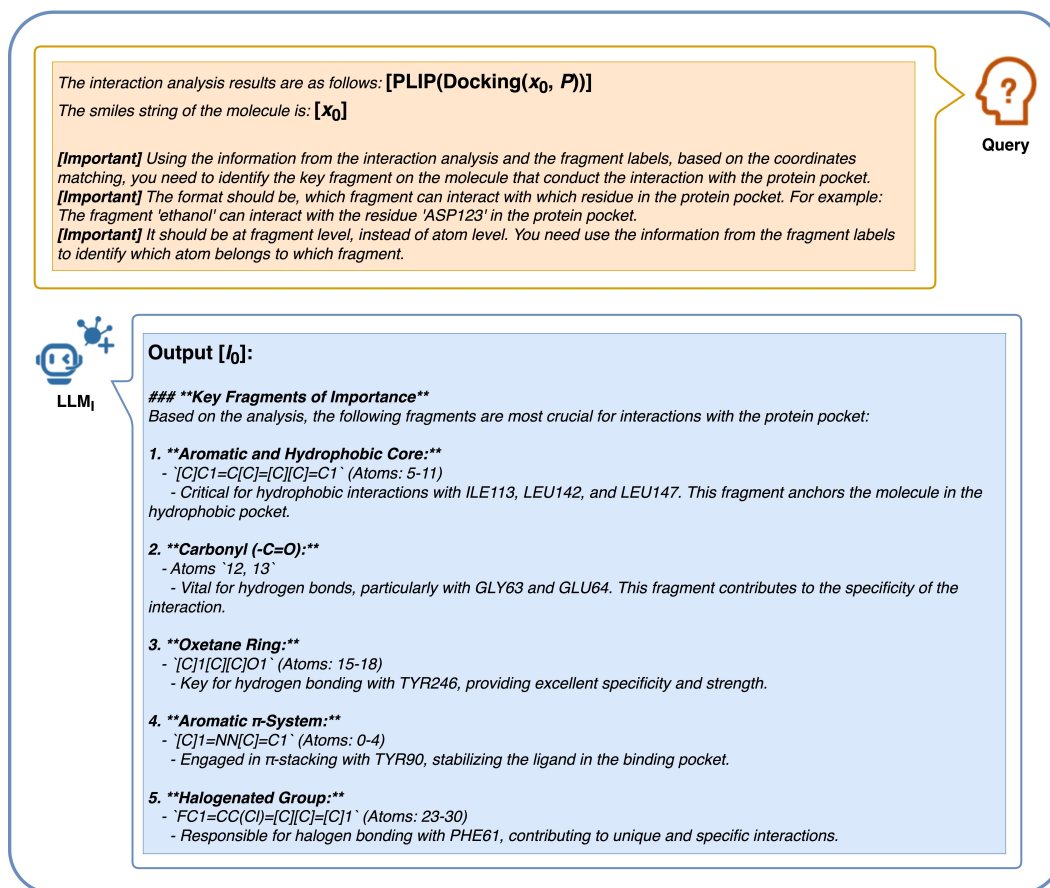

Figure 2: Interaction analysis module

## Design - Part 1

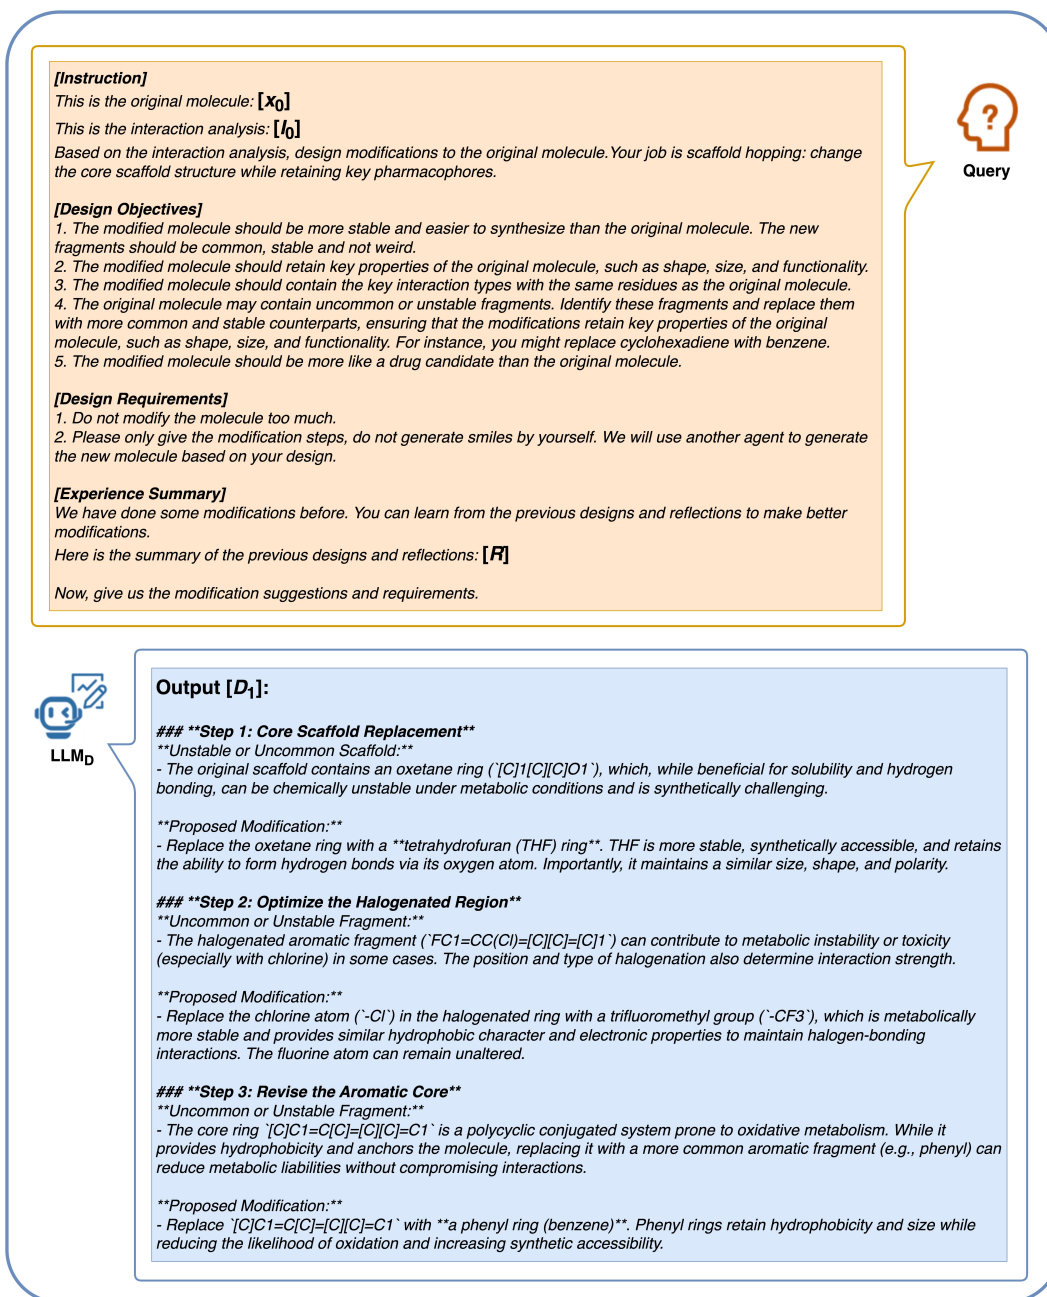

Figure 3: Design Module

## Design - Part 2

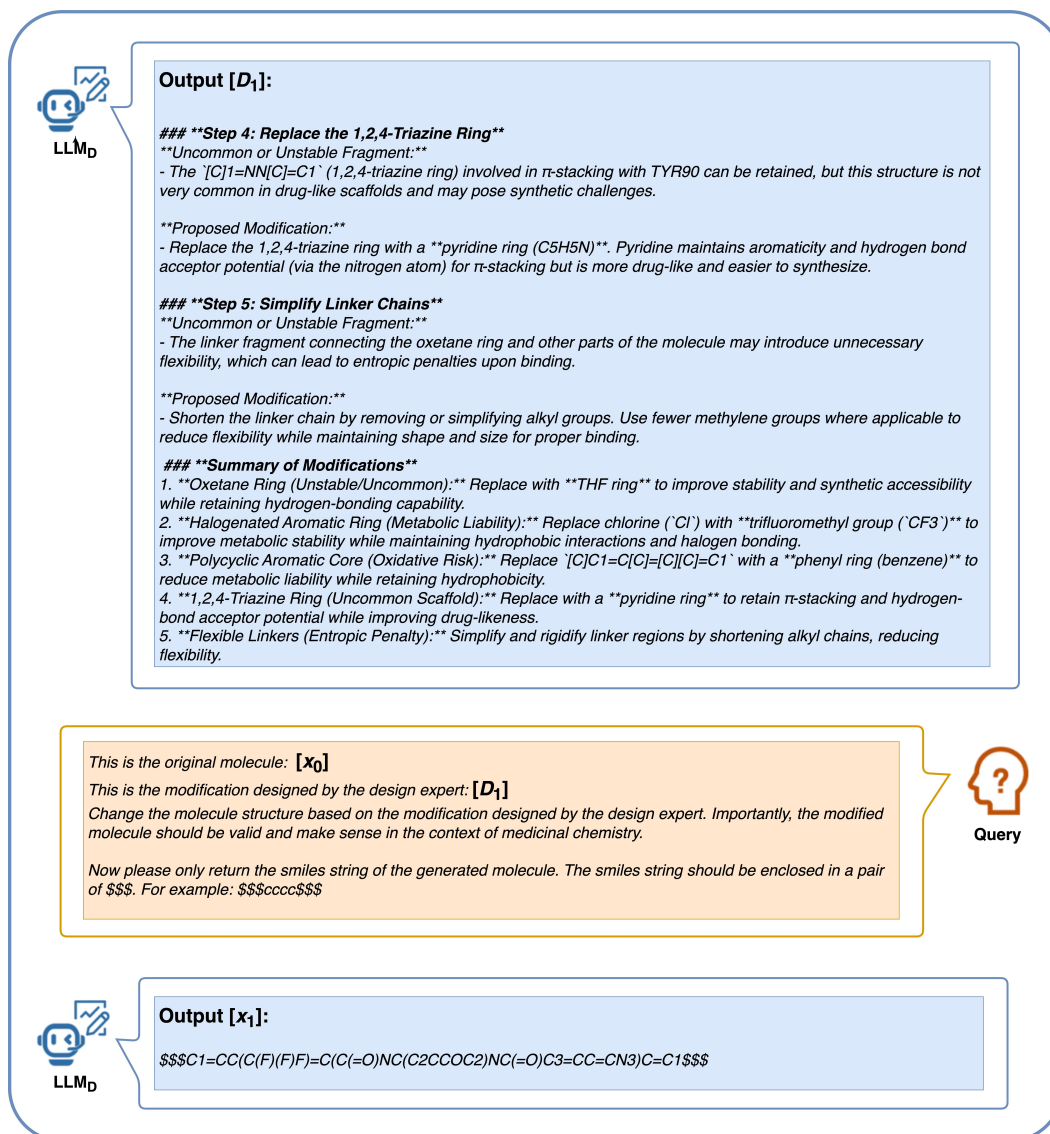

Figure 4: Design Module

## Reflection - Part 1

**[Instruction]**

=====

This is the original molecule structure: **[x<sub>0</sub>]**

This is the interaction analysis of this molecule and the protein pocket: **[I<sub>0</sub>]**

=====

This is the modification design generated by you: **[D<sub>1</sub>]**

This is the molecule structure designed based on your modification: **[x<sub>1</sub>]**

This is the interaction analysis generated by interaction export agent: **[I<sub>1</sub>]**

=====

Previously, we asked you to modify a molecule to get a new molecule that binds better to the protein pocket. We analyzed the binding of the new molecule to the protein pocket and put it together with the binding before the modification for comparison.

Based on these analyses, you need to reflect on the previous modification and provide feedback on the design. Besides, we hope you can find out which fragments inside the structure of these two molecules are useful for binding to the protein pocket.

=====

Please use critical thinking to analyze, pointing out both the good and the bad points. Your reflection is:

=====



Query



LLMR

**Output [R<sub>1</sub>]:**

### **\*\*Strengths of the Modifications\*\***

- \*\*Improved Stability and Synthetic Accessibility:\*\***
  - Replacing the **\*\*oxetane ring\*\*** with a **\*\*tetrahydrofuran (THF) ring\*\*** is a commendable adjustment. THF rings are more stable under metabolic conditions, while retaining key hydrogen-bonding interactions and similar steric bulk. This was a sensible change that aligns well with drug-likeness principles.
  - Removing the **\*\*chlorine atom\*\*** in favor of a **\*\*trifluoromethyl (CF<sub>3</sub>) group\*\*** was another thoughtful modification. The CF<sub>3</sub> group improves metabolic stability and reduces potential toxicity from reactive halogens, while maintaining the original hydrophobicity and shape.
- \*\*Retention of Key Interaction Modes:\*\***
  - The redesigned molecule retains critical interactions such as hydrogen bonding with HIS117 and ARG152, hydrophobic interactions with HIS60, LEU147, and PHE188, and  $\pi$ -stacking with TYR90. These interactions are crucial for binding affinity and ensure the molecule continues to engage the protein pocket effectively.
  - The **\*\*pyridine ring\*\*** (replacing the less common 1,2,4-triazine ring) aligns better with drug-likeness rules while maintaining hydrogen bonding and hydrophobic capabilities. This substitution strengthens the molecule's pharmacokinetic prospects.
- \*\*Refinement of Scaffolds and Simplification:\*\***
  - Simplifying the polycyclic aromatic core into a **\*\*benzene ring\*\*** was a reasonable modification to reduce oxidation-prone elements. This ensures the molecule is more stable and synthetically tractable without losing significant hydrophobic interactions.

### **\*\*Weaknesses of the Modifications\*\***

- \*\*Reduction in Docking Score:\*\***
  - The docking score decreased from **\*\* -11.76 (original molecule) \*\*** to **\*\* -9.215 (modified molecule) \*\***, indicating a clear drop in binding affinity. While the modified molecule retains key interactions, some critical binding contributions were inadvertently weakened during redesign. The TEF reduction suggests a loss of key complementary contacts between the ligand and protein pocket.
- \*\*Over-Simplification of the Aromatic Core:\*\***
  - Replacing the conjugated aromatic system (**\*\* '[C]C1=C[C]=C[C][C]=C1 '\*\***) with a simple **\*\*benzene ring\*\*** reduced the hydrophobic surface area and  $\pi$ -electron system available for interactions. Consequently, hydrophobic interactions with residues like TYR90, ILE113, and LEU142 were diminished, and the molecule lost some of its ability to stabilize key  $\pi$ -interactions within the pocket.
- \*\*Unutilized Potential of the Trifluoromethyl Group:\*\***
  - While the trifluoromethyl (CF<sub>3</sub>) group improved metabolic stability, it did not directly contribute to binding interactions within the protein pocket. This functional group occupies space but does not engage with any specific residues, effectively adding to molecular weight without enhancing binding. A better-placed or functionally active replacement could have yielded greater interaction strength.

Figure 5: Reflection Module

## Reflection - Part 2

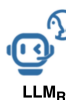

### Output [R<sub>1</sub>]:

#### 4. **Reduced Hydrogen Bonds:**

- The original molecule formed **multiple strong hydrogen bonds**, particularly with residues such as GLY63, GLU64, and TYR246 via its oxetane ring and carbonyl group. These hydrogen bonds were either weakened or lost in the redesign, with new hydrogen bonds (forming with HIS117 and ARG152) failing to fully compensate for this depletion.

#### 5. **Flexibility in the THF Ring:**

- While the THF ring is more stable than the oxetane ring, it likely introduces greater flexibility due to its sp<sup>3</sup>-hybridized carbons. This flexibility may lead to entropic penalties upon binding, making the molecule less efficient in achieving a preorganized, bioactive conformation.

#### 6. **Over-Reliance on Hydrophobic Interactions:**

- Similar to the original molecule, the modified structure still relies heavily on **hydrophobic interactions** for binding (e.g., HIS60, TYR90, LEU147). Hydrophobic interactions are less specific than polar or ionic interactions, which are critical for selectivity and affinity. By not introducing additional polar groups, the redesign missed an opportunity to improve overall binding specificity.

### ### **Comparison of Binding Fragments**

#### #### **Original Molecule:**

##### 1. **Oxetane Ring (Lost in the Redesign):**

- Forms key hydrogen bonds with TYR246 in the binding pocket, contributing significantly to specific and strong ligand binding. Its removal weakened overall binding affinity.

##### 2. **Conjugated Hydrophobic Core ('[C]C1=C[C]=[C][C]=C1'):**

- Provides extensive hydrophobic and  $\pi$ -stacking interactions with residues such as ILE113, LEU142, and TYR90. Replacing this rich aromatic structure with a benzene ring reduced the hydrophobic and  $\pi$ -electron contribution to binding.

##### 3. **Halogenated Aromatic Ring ('FC1=CC(CI)=C[C]=[C]1'):**

- Engages the protein via halogen bonding with PHE61, adding specificity to binding interactions. Replacing chlorine with CF<sub>3</sub> abolished some halogen bonds, weakening protein-ligand complementarity.

#### #### **Modified Molecule:**

##### 1. **THF Ring (Introduced):**

- Retains the ability to form hydrogen bonds (e.g., with ARG152). However, its introduction has caused greater flexibility and entropic penalties that may offset its stabilizing contributions.

##### 2. **Trifluoromethyl Group (CF<sub>3</sub>, Introduced):**

- Metabolically stable and hydrophobic but does not directly interact with the protein. Its placement on the aromatic ring adds molecular weight but no functional enhancement to binding.

##### 3. **Pyridine Ring (Introduced):**

- Maintains hydrogen-bonding with HIS117 and interacts hydrophobically with HIS60, performing well as a replacement for 1,2,4-triazine. Though not as inherently diverse in interaction opportunities as its predecessor, it improves the drug-likeness of the molecule.

##### 4. **Benzene Ring (Simplified):**

- While it retains some hydrophobic interaction capability, this fragment no longer engages residues like TYR90 or PHE188 as robustly as the original conjugated aromatic system. This reduced binding affinity.

Figure 6: Reflection Module

## Reflection - Part 3



LLM<sub>R</sub>

**Output [R<sub>1</sub>]:**

**### \*\*Key Fragments Retained or Lost for Binding\*\***

**\*\*Critical Retained Fragments:\*\***

1. **\*\*Pyridine Ring\*\*** for  $\pi$ -stacking and hydrogen bonding with TYR90 and HIS117.
2. **\*\*Hydrogen Bonding Carbonyl Group\*\*** interacting with HIS117 and ARG152.

**\*\*Critical Fragments Lost:\*\***

1. **\*\*Oxetane Ring\*\*** contributed unusually strong hydrogen bonds to TYR246, which were lost in the redesign.
2. **\*\*Conjugated Hydrophobic Core\*\*** ensured multisite hydrophobic interactions and  $\pi$ -stacking with residues like LEU142 and TYR90.
3. **\*\*Halogenated Aromatic Ring\*\*** provided halogen bonds with PHE61, contributing unique specificity lost in the redesign.

**### \*\*Suggestions for Improvement\*\***

1. **\*\*Reintroduce Hydrogen Bonding Groups:\*\***
  - Add back polar fragments (e.g., hydroxyl, amide groups) to increase hydrogen-bonding capacity with residues like TYR246, GLY63, and GLU64.
2. **\*\*Revisit the Aromatic Core:\*\***
  - Instead of oversimplifying the hydrophobic core to benzene, consider a polycyclic aromatic or heterocyclic system to balance hydrophobicity and metabolic stability.
3. **\*\*Optimize Trifluoromethyl Group Placement:\*\***
  - Move or replace the CF<sub>3</sub> group with a fragment that directly engages residues in the protein pocket (e.g., a difluorophenyl or hydrophilic substituent).
4. **\*\*Rigidify the THF Ring:\*\***
  - Lock the THF ring into a constrained system (e.g., fused bicyclic rings) to reduce flexibility and entropic penalties.

**### \*\*Conclusion\*\***

The modifications resulted in a molecule that is synthetically and metabolically improved but less effective in binding to the protein pocket, as indicated by the diminished docking score. While retaining important interactions, the redesign lost too many advantageous fragments (e.g., oxetane, conjugated aromatic core). Future optimizations should aim to restore lost interactions, improve hydrogen bonding, and balance hydrophobicity with polar contacts for stronger and more specific binding.

Figure 7: Reflection Module



## Selection - Part 1

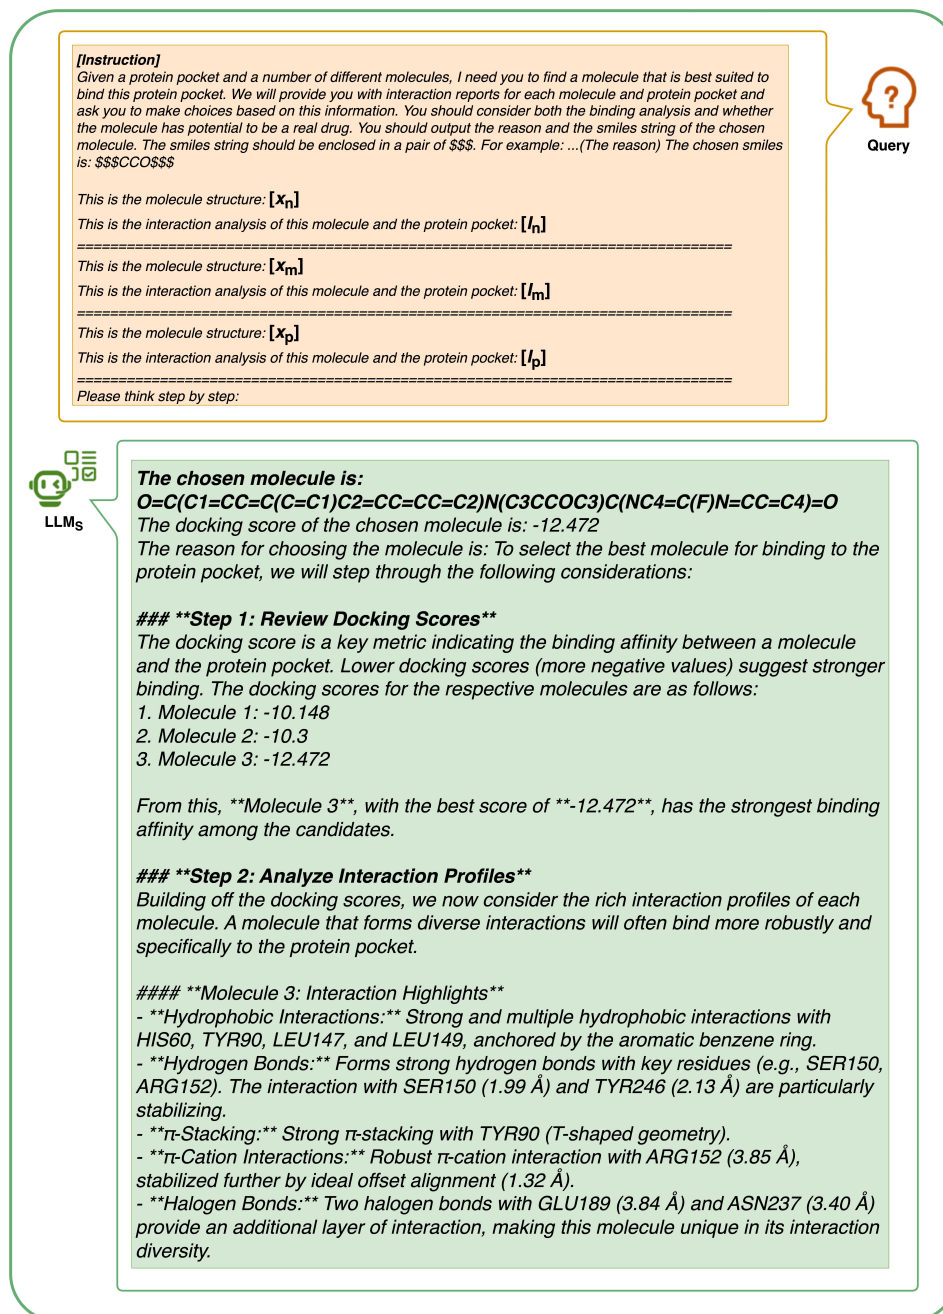

Figure 8: Selection Module



**\*\*Key Strengths:\*\***

- The interaction diversity and strength of Molecule 3 far surpass other molecules, leveraging hydrophobic forces, hydrogen bonding,  $\pi$ -stacking,  $\pi$ -cation interactions, and halogen bonding.
- The molecule effectively anchors itself to both polar and nonpolar regions, ensuring specificity for the protein pocket.

**### \*\*Step 3: Assess Drug-Like Properties\*\***

While binding affinity is crucial, the molecule must also exhibit potential as a drug. Properties relevant to drug-likeness include:

- **\*\*Hydrophobic Components:\*\*** Ensure solubility and stability for membrane diffusion.
- **\*\*Hydrogen Bonding Groups:\*\*** Contribute to specificity and bioactivity.
- **\*\*Halogen Incorporation:\*\*** Enhances membrane permeability and metabolic stability.
- **\*\*Compact, Non-Bulky Structure:\*\*** Ensures the molecule fits within the protein pocket without steric clashes.

For Molecule 3:

- The combination of aromatic rings, amide groups, and fluorine atoms supports balanced hydrophobic and polar properties, increasing stability and bioavailability.
- The inclusion of halogens enhances drug-likeness further.

Other molecules lack some features of Molecule 3. For example:

- Molecule 2 lacks halogen bonds and achieves a lower affinity score.
- Molecule 1 have good binding but lack the breadth of interactions seen with Molecule 3.

**### \*\*Step 4: Final Recommendation\*\***

Based on docking score, interaction diversity, and drug-likeness potential, **\*\*Molecule 3\*\*** is the best candidate. Its strong binding affinity (-12.472), balanced polar and nonpolar interactions, and drug-like properties make it an excellent starting point for further optimization.

**### \*\*Chosen Molecule\*\***

**\*\*Reason:\*\*** Molecule 3 exhibits the highest docking score, with diverse interaction types (hydrophobic, hydrogen bonding,  $\pi$ -stacking,  $\pi$ -cation, and halogen bonding) that secure it in critical regions of the protein pocket. Additionally, it offers promising drug-like features such as halogen incorporation and a well-optimized molecular structure.

**\*\*Selected SMILES String:\*\***

\$\$\$O=C(C1=CC=C(C=C1)C2=CC=CC=C2)N(C3CCOC3)C(NC4=C(F)N=CC=C4)=O\$\$\$

Figure 9: Selection Module

## 57 D Algorithm for MRR and AUR

58 The complete calculation process for assessing the reasonability of a molecule is outlined in Algo-  
 59 rithm 1.



---

**Algorithm 1:** Evaluation of Molecular Reasonability

---

**Input:** Molecule object (*mol*)

**Output:** Molecular Reasonability (*MRR*) and Atom Unreasonable Ratio (*AUR*)

**Step 1: Detect Carbonyl and Imine Group Carbons**

Initialize an empty list for *carbonyl/imine carbons*.

**foreach** *bond* in *mol* **do**

**if** *bond* is double and one atom is carbon, the other is oxygen or nitrogen **then**  
        Record the carbon atom in *carbonyl/imine groups*.

**Step 2: Identification of Ring Systems**

Identify all ring structures and their corresponding atom indices within *mol*.

Calculate the number of atoms in each ring.

**foreach** *ring* in the molecule **do**

**if** the ring shares one or more atoms with another ring **then**  
        Group the connected rings into a single *ring system*.

**Step 3: Evaluation of Molecular Reasonability**

Exclude any atoms previously identified as part of carbonyl or imine groups.

Classify the remaining carbon atoms in each ring system as follows:

- *sp<sup>2</sup> hybridized*: Aromatic or unsaturated carbons.
- *Non-sp<sup>2</sup> hybridized*: Saturated carbons.

**foreach** *ring system* in the ring systems **do**

**if** the ring system contains multiple rings and all carbon atoms are non-*sp<sup>2</sup>* **then**  
        Mark the molecule as unreasonable.  
        Add the atoms to the unreasonable atom list.

**foreach** *ring system* in the remaining ring systems **do**

**foreach** *ring* in the ring system **do**

**if** all carbon atoms within the ring are consistent in hybridization (either all *sp<sup>2</sup>* or all non-*sp<sup>2</sup>*) **then**  
            Mark the ring as reasonable.  
        **else**  
            Add the ring to the remaining ring list.

**while** the remaining ring list is not empty **do**

**foreach** *ring* in the remaining ring list **do**

        Exclude atoms that have already been classified as reasonable.  
        **if** all remaining carbon atoms are consistent in hybridization (either all *sp<sup>2</sup>* or all non-*sp<sup>2</sup>*) **then**  
            Mark the ring as reasonable.

**if** no new reasonable rings are identified **then**

        Mark the molecule as unreasonable.  
        Add the carbon atoms in the remaining rings to the unreasonable atom list.  
        **Exit the loop.**

Calculate *AUR* as the ratio of unreasonable atom count to the total ring atom count.

**Return** *MRR* and *AUR*.

---

## E QikProp properties

The full set of properties used for the QikProp pass ratio analysis is presented in Table 1.

The QikProp filter applied in the main text incorporates a comprehensive range of criteria provided by QikProp, including "#stars", "#amine", "#amidine", "#acid", "#amide", "#rotor", "#rtvFG", "mol\_MW", "dipole", "SASA", "FOSA", "FISA", "PISA", "WPSA", "volume", "donorHB", "acceptHB", "dip<sup>2</sup>/V", "ACxDN-5/SA", "glob", "QPpolrz", "QPlogPC16", "QPlogPoct", "QPlogPw", "QPlogPo/w", "QPlogS", "CIQPlogS", "QPPCaco", "QPlogBB", "QPPMDCK", "QPlogKp", "IP(eV)", "EA(eV)", "#metab", "QPlogKhsa", "PercentHumanOralAbsorption", "SAFluorine", "SAamideO", "PSA", "#NandO", and "RuleOfThree".

Table 1: QikProp Properties and Descriptors

| Property or Descriptor     | Description                                                                                                                        | Range or Recommended Values |
|----------------------------|------------------------------------------------------------------------------------------------------------------------------------|-----------------------------|
| Molecule name              | The molecule’s identifier derived from the title line in the input structure file. If no title is provided, the file name is used. |                             |
| #stars                     | Count of descriptors or properties falling outside the 95% range for known drugs. A higher count indicates reduced drug-likeness.  | 0 – 5                       |
| #amine                     | Total non-conjugated amine groups present in the molecule.                                                                         | 0 – 1                       |
| #amidine                   | Number of amidine or guanidine functional groups in the structure.                                                                 | 0                           |
| #acid                      | Quantity of carboxylic acid groups in the molecule.                                                                                | 0 – 1                       |
| #amide                     | Count of non-conjugated amide groups.                                                                                              | 0 – 1                       |
| #rotor                     | Number of rotatable bonds that are neither trivial nor sterically hindered.                                                        | 0 – 15                      |
| #rtvFG                     | Total reactive functional groups present in the molecule, potentially affecting stability or toxicity.                             | 0 – 2                       |
| mol_MW                     | Molecular weight of the compound.                                                                                                  | 130.0 – 725.0               |
| Dipole                     | Calculated dipole moment of the molecule in Debye units.                                                                           | 1.0 – 12.5                  |
| SASA                       | Solvent-accessible surface area (SASA) in square angstroms, measured with a probe of 1.4 Å radius.                                 | 300.0 – 1000.0              |
| FOSA                       | Hydrophobic part of the SASA, representing saturated carbon and attached hydrogen atoms.                                           | 0.0 – 750.0                 |
| FISA                       | Hydrophilic fraction of the SASA, encompassing polar atoms like nitrogen and oxygen.                                               | 7.0 – 330.0                 |
| PISA                       | SASA component attributable to $\pi$ -systems.                                                                                     | 0.0 – 450.0                 |
| WPSA                       | Weakly polar component of the SASA, including atoms like halogens, phosphorus, and sulfur.                                         | 0.0 – 175.0                 |
| Volume                     | Total solvent-accessible volume in cubic angstroms, determined with a 1.4 Å radius probe.                                          | 500.0 – 2000.0              |
| donorHB                    | Estimated number of hydrogen bonds donated to water in solution.                                                                   | 0.0 – 6.0                   |
| acceptHB                   | Estimated number of hydrogen bonds accepted from water.                                                                            | 2.0 – 20.0                  |
| Dip <sup>2</sup> /V        | Dipole moment squared divided by molecular volume, a key factor in solvation energy.                                               | 0.0 – 0.13                  |
| ACxDN <sup>(0.5)</sup> /SA | Cohesive interaction index in solids based on molecular properties.                                                                | 0.0 – 0.05                  |
| glob                       | Descriptor measuring how close the shape of a molecule is to a sphere.                                                             | 0.75 – 0.95                 |
| QPpolarz                   | Predicted molecular polarizability in cubic angstroms.                                                                             | 13.0 – 70.0                 |
| QPlogPC16                  | Predicted partition coefficient between hexadecane and gas phases.                                                                 | 4.0 – 18.0                  |
| QPlogPoct                  | Predicted partition coefficient between octanol and gas phases.                                                                    | 8.0 – 35.0                  |
| QPlogPw                    | Predicted partition coefficient between water and gas phases.                                                                      | 4.0 – 45.0                  |
| QPlogPo/w                  | Predicted partition coefficient between octanol and water phases.                                                                  | -2.0 – 6.5                  |
| QPlogS                     | Predicted solubility of the molecule in water (log S, in mol/L).                                                                   | -6.5 – 0.5                  |
| CIQPlogS                   | Conformation-independent prediction of water solubility (log S).                                                                   | -6.5 – 0.5                  |
| QPPCaco                    | Predicted permeability through Caco-2 cells, in nm/s.                                                                              | <25 poor, >500 great        |
| QPlogBB                    | Predicted partition coefficient for brain/blood.                                                                                   | -3.0 – 1.2                  |
| QPPMDCK                    | Predicted permeability through MDCK cells, in nm/s.                                                                                | <25 poor, >500 great        |
| QPlogKp                    | Predicted skin permeability (log Kp).                                                                                              | -8.0 – -1.0                 |
| IP(eV)                     | Ionization potential calculated using PM3.                                                                                         | 7.9 – 10.5                  |
| EA(eV)                     | Electron affinity calculated using PM3.                                                                                            | -0.9 – 1.7                  |
| #metab                     | Predicted number of possible metabolic reactions.                                                                                  | 1 – 8                       |
| QPlogKhsa                  | Predicted binding affinity to human serum albumin.                                                                                 | -1.5 – 1.5                  |
| HumanOralAbsorption        | Qualitative assessment of oral absorption: 1 (low), 2 (medium), or 3 (high).                                                       |                             |
| PercentHumanOralAbsorption | Quantitative prediction of oral absorption percentage.                                                                             | >80% high, <25% poor        |
| SAFluorine                 | Solvent-accessible fluorine surface area.                                                                                          | 0.0 – 100.0                 |
| SAamideO                   | Solvent-accessible surface area of amide oxygen atoms.                                                                             | 0.0 – 35.0                  |
| PSA                        | Polar surface area, calculated for nitrogen, oxygen, and carbonyl groups.                                                          | 7.0 – 200.0                 |
| #NandO                     | Total count of nitrogen and oxygen atoms.                                                                                          | 2 – 15                      |
| RuleOfFive                 | Number of Lipinski’s Rule of Five violations.                                                                                      | Max 4                       |
| RuleOfThree                | Number of Jorgensen’s Rule of Three violations.                                                                                    | Max 3                       |
| #ringatoms                 | Count of atoms within molecular rings.                                                                                             |                             |
| #in34                      | Number of atoms in 3- or 4-membered rings.                                                                                         |                             |
| #in56                      | Number of atoms in 5- or 6-membered rings.                                                                                         |                             |
| #noncon                    | Number of ring atoms unable to form conjugated aromatic systems.                                                                   |                             |
| #nonHtm                    | Count of heavy (non-hydrogen) atoms in the structure.                                                                              |                             |
| Jm                         | Predicted maximum transdermal transport rate ( $\mu\text{g cm}^{-2} \text{hr}^{-1}$ ).                                             |                             |

## 70 F Computing Resource

71 In this work, we primarily utilize pretrained 3D generative models and large language model (LLM)  
 72 APIs to conduct our experiments. The 3D model sampling is performed using a single NVIDIA A100  
 73 GPU. For the LLM component, we rely on API-based access provided by the service provider, which  
 74 requires no local computational resources.

## 75 G More Experiment Results

76 Based on the different criteria presented in Table 1, we provide additional pass ratio results in Table 2.  
 77 Filter 1 is identical to the QikProp filter used in the main text.  
 78 Filter 2 removes some non-essential properties and focuses on well-defined physicochemical proper-  
 79 ties, including "#rtvFG", "QPlogS", "QPlogPo/w", "mol\_MW", "dipole", "SASA", "FOSA", "FISA",  
 80 "IP(eV)", "EA(eV)", "#metab", "PercentHumanOralAbsorption", and "PSA".

81 Filter 3 assesses molecular compliance with the "RuleOfFive" criterion. However, instead of allowing  
 82 up to four violations as typically recommended, this filter adopts a stricter definition, considering  
 83 only molecules that fully comply (i.e., setting the maximum allowable violations to zero).

Table 2: QikProp results for different methods with and without CIDD

| Method            | Filter 1 | Filter 2 | Filter 3 |
|-------------------|----------|----------|----------|
| <b>Pocket2Mol</b> |          |          |          |
| Original          | 29.58%   | 51.52%   | 89.58%   |
| CIDD              | 56.97%   | 75.64%   | 92.24%   |
| <b>TargetDiff</b> |          |          |          |
| Original          | 26.32%   | 48.20%   | 69.47%   |
| CIDD              | 53.37%   | 75.60%   | 81.85%   |
| <b>DecompDiff</b> |          |          |          |
| Original          | 29.04%   | 53.96%   | 55.14%   |
| CIDD              | 37.54%   | 68.48%   | 65.64%   |
| <b>MolCRAFT</b>   |          |          |          |
| Original          | 22.37%   | 43.52%   | 66.45%   |
| CIDD              | 35.22%   | 63.23%   | 74.09%   |

## 84 H More cases

85 More generated molecules from CIDD are presented below. For each case, we display the initial  
 86 supporting molecule derived from 3D-SBDD models alongside the final designed molecules produced  
 87 by CIDD.

| Supporting molecule                                                                                                                                  | CIDD output                                                                                                                                        | Supporting molecule                                                                                                                                 | CIDD output                                                                                                                                         |
|------------------------------------------------------------------------------------------------------------------------------------------------------|----------------------------------------------------------------------------------------------------------------------------------------------------|-----------------------------------------------------------------------------------------------------------------------------------------------------|-----------------------------------------------------------------------------------------------------------------------------------------------------|
| 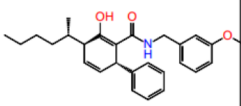<br>title: IDHP_HUMAN_40_452_0<br>: Unreasonable<br>vina: -7.824    | <br>title: IDHP_HUMAN_40_452_0<br>: Reasonable<br>vina: -10.106   | <br>title: IDHP_HUMAN_40_452_0<br>: Unreasonable<br>vina: -7.941  | <br>title: IDHP_HUMAN_40_452_0<br>: Reasonable<br>vina: -9.66    |
| <br>title: NOS1_HUMAN_302_723_0<br>: Unreasonable<br>vina: -9.415   | <br>title: NOS1_HUMAN_302_723_0<br>: Reasonable<br>vina: -10.098  | <br>title: NOS1_HUMAN_302_723_0<br>: Unreasonable<br>vina: -8.054  | <br>title: NOS1_HUMAN_302_723_0<br>: Reasonable<br>vina: -8.432  |
| <br>title: NOS1_HUMAN_302_723_0<br>: Unreasonable<br>vina: -10.069  | <br>title: NOS1_HUMAN_302_723_0<br>: Reasonable<br>vina: -10.22   | <br>title: NOS1_HUMAN_302_723_0<br>: Unreasonable<br>vina: -9.287 | <br>title: NOS1_HUMAN_302_723_0<br>: Reasonable<br>vina: -9.6    |
| <br>title: ABL2_HUMAN_274_551_0<br>: Unreasonable<br>vina: -10.007  | <br>title: ABL2_HUMAN_274_551_0<br>: Reasonable<br>vina: -10.946  | <br>title: ABL2_HUMAN_274_551_0<br>: Unreasonable<br>vina: -9.916 | <br>title: ABL2_HUMAN_274_551_0<br>: Reasonable<br>vina: -10.509 |
| <br>title: AK1BA_HUMAN_1_316_0<br>: Unreasonable<br>vina: -10.421 | <br>title: AK1BA_HUMAN_1_316_0<br>: Reasonable<br>vina: -10.778 | <br>title: NQO1_HUMAN_2_274_0<br>: Unreasonable<br>vina: -8.37  | <br>title: NQO1_HUMAN_2_274_0<br>: Reasonable<br>vina: -9.24   |
| <br>title: NQO1_HUMAN_2_274_0<br>: Unreasonable<br>vina: -7.951   | <br>title: NQO1_HUMAN_2_274_0<br>: Reasonable<br>vina: -9.51    | <br>title: PHP_SULSO_1_314_0<br>: Unreasonable<br>vina: -11.034 | <br>title: PHP_SULSO_1_314_0<br>: Reasonable<br>vina: -11.397  |

| Supporting molecule                                                                                                                                             | CIDD output                                                                                                                                                   | Supporting molecule                                                                                                                                           | CIDD output                                                                                                                                                  |
|-----------------------------------------------------------------------------------------------------------------------------------------------------------------|---------------------------------------------------------------------------------------------------------------------------------------------------------------|---------------------------------------------------------------------------------------------------------------------------------------------------------------|--------------------------------------------------------------------------------------------------------------------------------------------------------------|
| 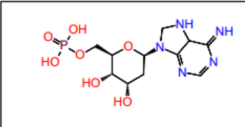 <p>title: PHKG1_RABIT_6_296_ATPsite_0<br/>: Unreasonable<br/>vina: -8.548</p> |  <p>title: PHKG1_RABIT_6_296_ATPsite_0<br/>: Reasonable<br/>vina: -8.727</p> |  <p>title: BGL07_ORYSJ_25_504_0<br/>: Unreasonable<br/>vina: -8.041</p>     |  <p>title: BGL07_ORYSJ_25_504_0<br/>: Reasonable<br/>vina: -9.949</p>     |
|  <p>title: CD38_HUMAN_44_300_0<br/>: Unreasonable<br/>vina: -7.443</p>         |  <p>title: CD38_HUMAN_44_300_0<br/>: Reasonable<br/>vina: -8.863</p>         |  <p>title: TNKS2_HUMAN_948_1162_0<br/>: Unreasonable<br/>vina: -10.284</p>  |  <p>title: TNKS2_HUMAN_948_1162_0<br/>: Reasonable<br/>vina: -10.974</p>  |
|  <p>title: P2Y12_HUMAN_1_342_0<br/>: Unreasonable<br/>vina: -10.463</p>        |  <p>title: P2Y12_HUMAN_1_342_0<br/>: Reasonable<br/>vina: -10.674</p>        |  <p>title: HMD_METJA_1_358_0<br/>: Unreasonable<br/>vina: -9.259</p>        |  <p>title: HMD_METJA_1_358_0<br/>: Reasonable<br/>vina: -10.458</p>       |
|  <p>title: SQHC_ALIAD_1_631_0<br/>: Unreasonable<br/>vina: -14.278</p>         |  <p>title: SQHC_ALIAD_1_631_0<br/>: Reasonable<br/>vina: -17.408</p>         |  <p>title: SQHC_ALIAD_1_631_0<br/>: Unreasonable<br/>vina: -13.626</p>      |  <p>title: SQHC_ALIAD_1_631_0<br/>: Reasonable<br/>vina: -13.825</p>      |
|  <p>title: BGAT_HUMAN_63_353_0<br/>: Unreasonable<br/>vina: -7.891</p>       |  <p>title: BGAT_HUMAN_63_353_0<br/>: Reasonable<br/>vina: -9.201</p>       |  <p>title: CHIB_SERMA_1_499_0<br/>: Unreasonable<br/>vina: -10.676</p>    |  <p>title: CHIB_SERMA_1_499_0<br/>: Reasonable<br/>vina: -13.113</p>    |
|  <p>title: CHIB_SERMA_1_499_0<br/>: Unreasonable<br/>vina: -7.115</p>        |  <p>title: CHIB_SERMA_1_499_0<br/>: Reasonable<br/>vina: -8.719</p>        |  <p>title: NRIH4_HUMAN_258_486_0<br/>: Unreasonable<br/>vina: -10.038</p> |  <p>title: NRIH4_HUMAN_258_486_0<br/>: Reasonable<br/>vina: -11.021</p> |

## Supporting molecule

## CIDD output

|                                                                                     |                                                                                     |
|-------------------------------------------------------------------------------------|-------------------------------------------------------------------------------------|
| 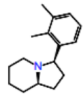   |    |
| title: SDIA_ECOLI_1_171_0<br>: Unreasonable<br>vina: -11.019                        | title: SDIA_ECOLI_1_171_0<br>: Reasonable<br>vina: -11.294                          |
|    |    |
| title: GSTP1_HUMAN_2_210_0<br>: Unreasonable<br>vina: -7.591                        | title: GSTP1_HUMAN_2_210_0<br>: Reasonable<br>vina: -8.725                          |
|    |    |
| title: HDHA_ECOLI_1_255_0<br>: Unreasonable<br>vina: -8.5                           | title: HDHA_ECOLI_1_255_0<br>: Reasonable<br>vina: -8.515                           |
|    |    |
| title: IDHP_HUMAN_40_452_0<br>: Unreasonable<br>vina: -8.176                        | title: IDHP_HUMAN_40_452_0<br>: Reasonable<br>vina: -10.774                         |
|   |   |
| title: IDHP_HUMAN_40_452_0<br>: Unreasonable<br>vina: -7.605                        | title: IDHP_HUMAN_40_452_0<br>: Reasonable<br>vina: -11.661                         |
|  |  |
| title: AK1B_HUMAN_1_316_0<br>: Unreasonable<br>vina: -9.845                         | title: AK1B_HUMAN_1_316_0<br>: Reasonable<br>vina: -9.981                           |
|  |  |
| title: OLIAC_CANSA_1_101_0<br>: Unreasonable<br>vina: -7.631                        | title: OLIAC_CANSA_1_101_0<br>: Reasonable<br>vina: -8.866                          |

## Supporting molecule

## CIDD output

|                                                                                      |                                                                                       |
|--------------------------------------------------------------------------------------|---------------------------------------------------------------------------------------|
| 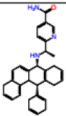    |    |
| title: SDIA_ECOLI_1_171_0<br>: Unreasonable<br>vina: -8.52                           | title: SDIA_ECOLI_1_171_0<br>: Reasonable<br>vina: -13.937                            |
|    |    |
| title: HDHA_ECOLI_1_255_0<br>: Unreasonable<br>vina: -7.709                          | title: HDHA_ECOLI_1_255_0<br>: Reasonable<br>vina: -8.778                             |
|    |    |
| title: NOS1_HUMAN_302_723_0<br>: Unreasonable<br>vina: -11.943                       | title: NOS1_HUMAN_302_723_0<br>: Reasonable<br>vina: -12.979                          |
|    |    |
| title: NR1H4_HUMAN_258_486_0<br>: Unreasonable<br>vina: -6.824                       | title: NR1H4_HUMAN_258_486_0<br>: Reasonable<br>vina: -8.578                          |
|   |   |
| title: CPXB_BACMB_2_464_0<br>: Unreasonable<br>vina: -9.607                          | title: CPXB_BACMB_2_464_0<br>: Reasonable<br>vina: -10.132                            |
|  |  |
| title: P2Y12_HUMAN_1_342_0<br>: Unreasonable<br>vina: -7.75                          | title: P2Y12_HUMAN_1_342_0<br>: Reasonable<br>vina: -16.253                           |
|  |  |
| title: SIR3_HUMAN_117_398_0<br>: Unreasonable<br>vina: -8.238                        | title: SIR3_HUMAN_117_398_0<br>: Reasonable<br>vina: -8.331                           |

## Supporting molecule

## CIDD output

|                                                                                                                                                       |                                                                                                                                                     |
|-------------------------------------------------------------------------------------------------------------------------------------------------------|-----------------------------------------------------------------------------------------------------------------------------------------------------|
| 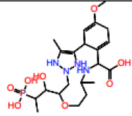<br>title: MCCF_ECOLDX_1_344_0<br>: Unreasonable<br>vina: -8.726     | <br>title: MCCF_ECOLDX_1_344_0<br>: Reasonable<br>vina: -8.947     |
| <br>title: IDHP_HUMAN_40_452_0<br>: Unreasonable<br>vina: -7.796     | <br>title: IDHP_HUMAN_40_452_0<br>: Reasonable<br>vina: -11.383    |
| <br>title: AKT1_HUMAN_1_137_0<br>: Unreasonable<br>vina: -8.605      | <br>title: AKT1_HUMAN_1_137_0<br>: Reasonable<br>vina: -9.926      |
| <br>title: HMD_METJA_1_358_0<br>: Unreasonable<br>vina: -7.825       | <br>title: HMD_METJA_1_358_0<br>: Reasonable<br>vina: -8.55        |
| <br>title: SIR3_HUMAN_117_398_0<br>: Unreasonable<br>vina: -7.93    | <br>title: SIR3_HUMAN_117_398_0<br>: Reasonable<br>vina: -10.435  |
| <br>title: DYRK2_HUMAN_145_550_0<br>: Unreasonable<br>vina: -7.961 | <br>title: DYRK2_HUMAN_145_550_0<br>: Reasonable<br>vina: -8.399 |
| <br>title: DIDH_RAT_1_319_0<br>: Unreasonable<br>vina: -9.165      | <br>title: DIDH_RAT_1_319_0<br>: Reasonable<br>vina: -10.631     |

## Supporting molecule

## CIDD output

|                                                                                                                                                      |                                                                                                                                                      |
|------------------------------------------------------------------------------------------------------------------------------------------------------|------------------------------------------------------------------------------------------------------------------------------------------------------|
| 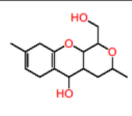<br>title: DIDH_RAT_1_319_0<br>: Unreasonable<br>vina: -8.26       | <br>title: DIDH_RAT_1_319_0<br>: Reasonable<br>vina: -8.722       |
| <br>title: COAA_MYCTU_1_312_0<br>: Unreasonable<br>vina: -7.572    | <br>title: COAA_MYCTU_1_312_0<br>: Reasonable<br>vina: -9.731     |
| <br>title: M3K14_HUMAN_321_678_0<br>: Unreasonable<br>vina: -7.453 | <br>title: M3K14_HUMAN_321_678_0<br>: Reasonable<br>vina: -9.209  |
| <br>title: CHIB1_ASPPM_39_433_0<br>: Unreasonable<br>vina: -8.054  | <br>title: CHIB1_ASPPM_39_433_0<br>: Reasonable<br>vina: -10.096  |
| <br>title: SIR3_HUMAN_117_398_0<br>: Unreasonable<br>vina: -6.991 | <br>title: SIR3_HUMAN_117_398_0<br>: Reasonable<br>vina: -10.758 |
| <br>title: NOS3_HUMAN_65_480_0<br>: Unreasonable<br>vina: -9.583 | <br>title: NOS3_HUMAN_65_480_0<br>: Reasonable<br>vina: -10.652 |
| <br>title: DIDH_RAT_1_319_0<br>: Unreasonable<br>vina: -8.503    | <br>title: DIDH_RAT_1_319_0<br>: Reasonable<br>vina: -8.895     |

Supporting molecule      CIDD output

|                                                                                                                                                      |                                                                                                                                                    |
|------------------------------------------------------------------------------------------------------------------------------------------------------|----------------------------------------------------------------------------------------------------------------------------------------------------|
| 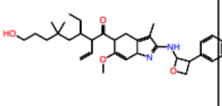<br>title: BACE2_HUMAN_76_460_0<br>: Unreasonable<br>vina: -8.586   | <br>title: BACE2_HUMAN_76_460_0<br>: Reasonable<br>vina: -9.854   |
| <br>title: F16P1_HUMAN_1_338_0<br>: Unreasonable<br>vina: -8.173    | <br>title: F16P1_HUMAN_1_338_0<br>: Reasonable<br>vina: -8.633    |
| <br>title: CAT_ECOLX_1_219_0<br>: Unreasonable<br>vina: -9.838      | <br>title: CAT_ECOLX_1_219_0<br>: Reasonable<br>vina: -10.164     |
| <br>title: DFPA_LOLVU_2_314_0<br>: Unreasonable<br>vina: -7.208     | <br>title: DFPA_LOLVU_2_314_0<br>: Reasonable<br>vina: -8.581     |
| <br>title: QPCT_HUMAN_33_361_0<br>: Unreasonable<br>vina: -8.178   | <br>title: QPCT_HUMAN_33_361_0<br>: Reasonable<br>vina: -9.527   |
| <br>title: KS6A3_HUMAN_41_357_0<br>: Unreasonable<br>vina: -8.242 | <br>title: KS6A3_HUMAN_41_357_0<br>: Reasonable<br>vina: -8.738 |
| <br>title: AROE_THET8_1_263_0<br>: Unreasonable<br>vina: -8.741   | <br>title: AROE_THET8_1_263_0<br>: Reasonable<br>vina: -8.794   |

Supporting molecule      CIDD output

|                                                                                                                                                     |                                                                                                                                                     |
|-----------------------------------------------------------------------------------------------------------------------------------------------------|-----------------------------------------------------------------------------------------------------------------------------------------------------|
| 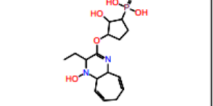<br>title: GRK4_HUMAN_1_578_0<br>: Unreasonable<br>vina: -7.158   | <br>title: GRK4_HUMAN_1_578_0<br>: Reasonable<br>vina: -8.93     |
| <br>title: CPXB_BACMB_2_464_0<br>: Unreasonable<br>vina: -10.201  | <br>title: CPXB_BACMB_2_464_0<br>: Reasonable<br>vina: -11.121   |
| <br>title: BSD_ASPTTE_1_130_0<br>: Unreasonable<br>vina: -7.492   | <br>title: BSD_ASPTTE_1_130_0<br>: Reasonable<br>vina: -8.786    |
| <br>title: RGI_RAUSE_1_513_0<br>: Unreasonable<br>vina: -10.06    | <br>title: RGI_RAUSE_1_513_0<br>: Reasonable<br>vina: -11.978    |
| <br>title: QPCT_HUMAN_33_361_0<br>: Unreasonable<br>vina: -7.531 | <br>title: QPCT_HUMAN_33_361_0<br>: Reasonable<br>vina: -8.356  |
| <br>title: GUX1_HYPJE_18_451_0<br>: Unreasonable<br>vina: -7.25 | <br>title: GUX1_HYPJE_18_451_0<br>: Reasonable<br>vina: -8.375 |
| <br>title: UPPS_ECOLI_1_253_0<br>: Unreasonable<br>vina: -7.288 | <br>title: UPPS_ECOLI_1_253_0<br>: Reasonable<br>vina: -8.315  |



## Supporting molecule

## CIDD output

|                                                                                                                                                     |                                                                                                                                                   |
|-----------------------------------------------------------------------------------------------------------------------------------------------------|---------------------------------------------------------------------------------------------------------------------------------------------------|
| 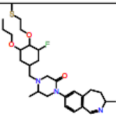<br>title: CAT_ECOLDX_1_219_0<br>: Unreasonable<br>vina: -9.836    | <br>title: CAT_ECOLDX_1_219_0<br>: Reasonable<br>vina: -11.246   |
| <br>title: NOS2_HUMAN_78_505_0<br>: Unreasonable<br>vina: -10.504  | <br>title: NOS2_HUMAN_78_505_0<br>: Reasonable<br>vina: -11.006  |
| <br>title: BTRN_BACCI_2_250_0<br>: Unreasonable<br>vina: -4.306    | <br>title: BTRN_BACCI_2_250_0<br>: Reasonable<br>vina: -11.729   |
| <br>title: ACE_HUMAN_650_1230_0<br>: Unreasonable<br>vina: -9.498  | <br>title: ACE_HUMAN_650_1230_0<br>: Reasonable<br>vina: -10.987 |
| <br>title: AKT1_HUMAN_1_137_0<br>: Unreasonable<br>vina: -11.185  | <br>title: AKT1_HUMAN_1_137_0<br>: Reasonable<br>vina: -11.293  |
| <br>title: BAPA_SPHXN_30_402_0<br>: Unreasonable<br>vina: -7.681 | <br>title: BAPA_SPHXN_30_402_0<br>: Reasonable<br>vina: -8.683 |

## Supporting molecule

## CIDD output

|                                                                                                                                                     |                                                                                                                                                     |
|-----------------------------------------------------------------------------------------------------------------------------------------------------|-----------------------------------------------------------------------------------------------------------------------------------------------------|
| 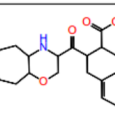<br>title: ATS5_HUMAN_262_480_0<br>: Unreasonable<br>vina: -8.133  | <br>title: ATS5_HUMAN_262_480_0<br>: Reasonable<br>vina: -8.863  |
| <br>title: NOS2_HUMAN_78_505_0<br>: Unreasonable<br>vina: -10.76   | <br>title: NOS2_HUMAN_78_505_0<br>: Reasonable<br>vina: -12.037  |
| <br>title: ACE_HUMAN_650_1230_0<br>: Unreasonable<br>vina: -8.564  | <br>title: ACE_HUMAN_650_1230_0<br>: Reasonable<br>vina: -10.503 |
| <br>title: ACE_HUMAN_650_1230_0<br>: Unreasonable<br>vina: -8.69   | <br>title: ACE_HUMAN_650_1230_0<br>: Reasonable<br>vina: -8.905  |
| <br>title: TBK1_HUMAN_1_303_0<br>: Unreasonable<br>vina: -7.693   | <br>title: TBK1_HUMAN_1_303_0<br>: Reasonable<br>vina: -8.868   |
| <br>title: BAPA_SPHXN_30_402_0<br>: Unreasonable<br>vina: -7.794 | <br>title: BAPA_SPHXN_30_402_0<br>: Reasonable<br>vina: -8.198 |

Supporting molecule      CIDD output

|                                                                                                                                                                 |                                                                                                                                                               |
|-----------------------------------------------------------------------------------------------------------------------------------------------------------------|---------------------------------------------------------------------------------------------------------------------------------------------------------------|
| 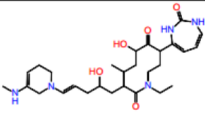 <p>title: PHKG1_RABIT_6_296_ATPsite_0<br/>: Unreasonable<br/>vina: -8.922</p> |  <p>title: PHKG1_RABIT_6_296_ATPsite_0<br/>: Reasonable<br/>vina: -9.205</p> |
|  <p>title: RGI_RAUSE_1_513_0<br/>: Unreasonable<br/>vina: -10.484</p>          |  <p>title: RGI_RAUSE_1_513_0<br/>: Reasonable<br/>vina: -11.024</p>          |
|  <p>title: CD38_HUMAN_44_300_0<br/>: Unreasonable<br/>vina: -8.72</p>          |  <p>title: CD38_HUMAN_44_300_0<br/>: Reasonable<br/>vina: -9.327</p>         |
|  <p>title: XANLY_BACGL_26_777_0<br/>: Unreasonable<br/>vina: -9.053</p>        |  <p>title: XANLY_BACGL_26_777_0<br/>: Reasonable<br/>vina: -9.483</p>        |
|  <p>title: PPIA_HUMAN_1_165_0<br/>: Unreasonable<br/>vina: -8.023</p>        |  <p>title: PPIA_HUMAN_1_165_0<br/>: Reasonable<br/>vina: -8.605</p>        |
|  <p>title: SQHC_ALIAD_1_631_0<br/>: Unreasonable<br/>vina: -11.51</p>        |  <p>title: SQHC_ALIAD_1_631_0<br/>: Reasonable<br/>vina: -14.292</p>       |

Supporting molecule      CIDD output

|                                                                                                                                                            |                                                                                                                                                             |
|------------------------------------------------------------------------------------------------------------------------------------------------------------|-------------------------------------------------------------------------------------------------------------------------------------------------------------|
| 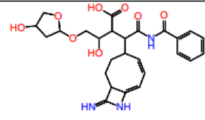 <p>title: BGL07_ORYSJ_25_504_0<br/>: Unreasonable<br/>vina: -10.446</p> |  <p>title: BGL07_ORYSJ_25_504_0<br/>: Reasonable<br/>vina: -10.592</p>   |
|  <p>title: DPP2_HUMAN_27_492_0<br/>: Unreasonable<br/>vina: -9.855</p>   |  <p>title: DPP2_HUMAN_27_492_0<br/>: Reasonable<br/>vina: -11.224</p>    |
|  <p>title: PTGIS_HUMAN_20_500_0<br/>: Unreasonable<br/>vina: -8.318</p>  |  <p>title: PTGIS_HUMAN_20_500_0<br/>: Reasonable<br/>vina: -9.448</p>    |
|  <p>title: PPIA_HUMAN_1_165_0<br/>: Unreasonable<br/>vina: -8.777</p>    |  <p>title: PPIA_HUMAN_1_165_0<br/>: Reasonable<br/>vina: -10.083</p>     |
|  <p>title: HMD_METJA_1_358_0<br/>: Unreasonable<br/>vina: -8.349</p>   |  <p>title: HMD_METJA_1_358_0<br/>: Reasonable<br/>vina: -9.593</p>     |
|  <p>title: KS6A3_HUMAN_41_357_0<br/>: Unreasonable<br/>vina: -8.967</p> |  <p>title: KS6A3_HUMAN_41_357_0<br/>: Reasonable<br/>vina: -11.101</p> |

Supporting molecule      CIDD output

|                                                                                     |                                                                                     |
|-------------------------------------------------------------------------------------|-------------------------------------------------------------------------------------|
| 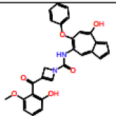   |    |
| title: KS6A3_HUMAN_41_357_0<br>: Unreasonable<br>vina: -9.414                       | title: KS6A3_HUMAN_41_357_0<br>: Reasonable<br>vina: -9.746                         |
|    |    |
| title: NR1H4_HUMAN_258_486_0<br>: Unreasonable<br>vina: -3.528                      | title: NR1H4_HUMAN_258_486_0<br>: Reasonable<br>vina: -14.043                       |
|    |    |
| title: SDIA_ECOLI_1_171_0<br>: Unreasonable<br>vina: -10.997                        | title: SDIA_ECOLI_1_171_0<br>: Reasonable<br>vina: -13.15                           |
|    |    |
| title: HDHA_ECOLI_1_255_0<br>: Unreasonable<br>vina: -9.845                         | title: HDHA_ECOLI_1_255_0<br>: Reasonable<br>vina: -9.957                           |
|   |   |
| title: IDHP_HUMAN_40_452_0<br>: Unreasonable<br>vina: -8.034                        | title: IDHP_HUMAN_40_452_0<br>: Reasonable<br>vina: -10.368                         |
|  |  |
| title: AKT1_HUMAN_1_137_0<br>: Unreasonable<br>vina: -10.124                        | title: AKT1_HUMAN_1_137_0<br>: Reasonable<br>vina: -10.13                           |

Supporting molecule      CIDD output

|                                                                                      |                                                                                       |
|--------------------------------------------------------------------------------------|---------------------------------------------------------------------------------------|
| 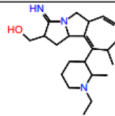   |    |
| title: DYRK2_HUMAN_145_550_0<br>: Unreasonable<br>vina: -6.725                       | title: DYRK2_HUMAN_145_550_0<br>: Reasonable<br>vina: -9.337                          |
|     |    |
| title: BACE2_HUMAN_76_460_0<br>: Unreasonable<br>vina: -9.145                        | title: BACE2_HUMAN_76_460_0<br>: Reasonable<br>vina: -9.806                           |
|    |    |
| title: TRAR_RHIRD_1_234_0<br>: Unreasonable<br>vina: -8.935                          | title: TRAR_RHIRD_1_234_0<br>: Reasonable<br>vina: -12.018                            |
|     |    |
| title: UPPS_ECOLI_1_253_0<br>: Unreasonable<br>vina: -7.717                          | title: UPPS_ECOLI_1_253_0<br>: Reasonable<br>vina: -10.031                            |
|   |   |
| title: ABL2_HUMAN_274_551_0<br>: Unreasonable<br>vina: -10.488                       | title: ABL2_HUMAN_274_551_0<br>: Reasonable<br>vina: -10.776                          |
|  |  |
| title:<br>: Unreasonable<br>vina: -10.487                                            | title:<br>: Reasonable<br>vina: -10.893                                               |

| Supporting molecule                                                                                                                                              | CIDD output                                                                                                                                                    | Supporting molecule                                                                                                                                         | CIDD output                                                                                                                                                |
|------------------------------------------------------------------------------------------------------------------------------------------------------------------|----------------------------------------------------------------------------------------------------------------------------------------------------------------|-------------------------------------------------------------------------------------------------------------------------------------------------------------|------------------------------------------------------------------------------------------------------------------------------------------------------------|
| 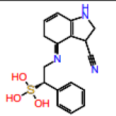 <p>title: MURA_ECOLI_1_419_catalytic_0<br/>: Unreasonable<br/>vina: -8.295</p> |  <p>title: MURA_ECOLI_1_419_catalytic_0<br/>: Reasonable<br/>vina: -9.241</p> |  <p>title: BGL07_ORYSJ_25_504_0<br/>: Unreasonable<br/>vina: -8.187</p>   |  <p>title: BGL07_ORYSJ_25_504_0<br/>: Reasonable<br/>vina: -8.434</p>   |
|  <p>title: BGL07_ORYSJ_25_504_0<br/>: Unreasonable<br/>vina: -8.028</p>         |  <p>title: BGL07_ORYSJ_25_504_0<br/>: Reasonable<br/>vina: -9.632</p>         |  <p>title: PAC_ECOLX_27_846_0<br/>: Unreasonable<br/>vina: -8.228</p>     |  <p>title: PAC_ECOLX_27_846_0<br/>: Reasonable<br/>vina: -8.313</p>     |
|  <p>title: PAC_ECOLX_27_846_0<br/>: Unreasonable<br/>vina: -9.538</p>           |  <p>title: PAC_ECOLX_27_846_0<br/>: Reasonable<br/>vina: -10.042</p>          |  <p>title: P2Y12_HUMAN_1_342_0<br/>: Unreasonable<br/>vina: -8.514</p>    |  <p>title: P2Y12_HUMAN_1_342_0<br/>: Reasonable<br/>vina: -8.942</p>    |
|  <p>title: EXG1_CANAL_41_438_0<br/>: Unreasonable<br/>vina: -9.965</p>          |  <p>title: EXG1_CANAL_41_438_0<br/>: Reasonable<br/>vina: -10.569</p>         |  <p>title: FKB1A_HUMAN_2_108_0<br/>: Unreasonable<br/>vina: -7.899</p>    |  <p>title: FKB1A_HUMAN_2_108_0<br/>: Reasonable<br/>vina: -8.786</p>    |
|  <p>title: CHIB_SERMA_1_499_0<br/>: Unreasonable<br/>vina: -9.972</p>         |  <p>title: CHIB_SERMA_1_499_0<br/>: Reasonable<br/>vina: -10.354</p>        |  <p>title: KS6A3_HUMAN_41_357_0<br/>: Unreasonable<br/>vina: -7.827</p> |  <p>title: KS6A3_HUMAN_41_357_0<br/>: Reasonable<br/>vina: -8.545</p> |
|  <p>title: SDIA_ECOLI_1_171_0<br/>: Unreasonable<br/>vina: -10.933</p>        |  <p>title: SDIA_ECOLI_1_171_0<br/>: Reasonable<br/>vina: -11.339</p>        |  <p>title: GUX1_HYPJE_18_451_0<br/>: Unreasonable<br/>vina: -10.767</p> |  <p>title: GUX1_HYPJE_18_451_0<br/>: Reasonable<br/>vina: -12.3</p>   |

| Supporting molecule                                                                                                                                  | CIDD output                                                                                                                                        | Supporting molecule                                                                                                                                  | CIDD output                                                                                                                                         |
|------------------------------------------------------------------------------------------------------------------------------------------------------|----------------------------------------------------------------------------------------------------------------------------------------------------|------------------------------------------------------------------------------------------------------------------------------------------------------|-----------------------------------------------------------------------------------------------------------------------------------------------------|
| 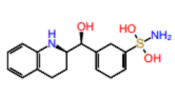<br>title: HDHA_ECOLI_1_255_0<br>: Unreasonable<br>vina: -8.511     | <br>title: HDHA_ECOLI_1_255_0<br>: Reasonable<br>vina: -9.995     | <br>title: ODBB_THET8_1_324_0<br>: Unreasonable<br>vina: -9.002    | <br>title: ODBB_THET8_1_324_0<br>: Reasonable<br>vina: -9.322    |
| <br>title: IDHP_HUMAN_40_452_0<br>: Unreasonable<br>vina: -8.039    | <br>title: IDHP_HUMAN_40_452_0<br>: Reasonable<br>vina: -9.819    | <br>title: CPXB_BACMB_2_464_0<br>: Unreasonable<br>vina: -9.196     | <br>title: CPXB_BACMB_2_464_0<br>: Reasonable<br>vina: -12.034   |
| <br>title: NOS1_HUMAN_302_723_0<br>: Unreasonable<br>vina: -9.495   | <br>title: NOS1_HUMAN_302_723_0<br>: Reasonable<br>vina: -9.579   | <br>title: NOS1_HUMAN_302_723_0<br>: Unreasonable<br>vina: -10.062 | <br>title: NOS1_HUMAN_302_723_0<br>: Reasonable<br>vina: -10.305 |
| <br>title: CAT_ECOLX_1_219_0<br>: Unreasonable<br>vina: -9.2        | <br>title: CAT_ECOLX_1_219_0<br>: Reasonable<br>vina: -13.057     | <br>title: BSD_ASPTE_1_130_0<br>: Unreasonable<br>vina: -8.807     | <br>title: BSD_ASPTE_1_130_0<br>: Reasonable<br>vina: -9.501     |
| <br>title: ABL2_HUMAN_274_551_0<br>: Unreasonable<br>vina: -10.702 | <br>title: ABL2_HUMAN_274_551_0<br>: Reasonable<br>vina: -11.583 | <br>title: NQO1_HUMAN_2_274_0<br>: Unreasonable<br>vina: -9.262    | <br>title: NQO1_HUMAN_2_274_0<br>: Reasonable<br>vina: -10.424  |
| <br>title: BTRN_BACCI_2_250_0<br>: Unreasonable<br>vina: -8.786   | <br>title: BTRN_BACCI_2_250_0<br>: Reasonable<br>vina: -8.951   | <br>title: NAGZ_VIBCH_1_330_0<br>: Unreasonable<br>vina: -7.206  | <br>title: NAGZ_VIBCH_1_330_0<br>: Reasonable<br>vina: -8.307  |
| <br>title: AKT1_HUMAN_1_137_0<br>: Unreasonable<br>vina: -10.1    | <br>title: AKT1_HUMAN_1_137_0<br>: Reasonable<br>vina: -11.478  | <br>title: AKT1_HUMAN_1_137_0<br>: Unreasonable<br>vina: -12.405 | <br>title: AKT1_HUMAN_1_137_0<br>: Reasonable<br>vina: -13.048 |

| Supporting molecule                                                                                                                                  | CIDD output                                                                                                                                        | Supporting molecule                                                                                                                                            | CIDD output                                                                                                                                                   |
|------------------------------------------------------------------------------------------------------------------------------------------------------|----------------------------------------------------------------------------------------------------------------------------------------------------|----------------------------------------------------------------------------------------------------------------------------------------------------------------|---------------------------------------------------------------------------------------------------------------------------------------------------------------|
| 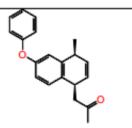<br>title: PA21B_PIG_23_146_0<br>: Unreasonable<br>vina: -8.391     | <br>title: PA21B_PIG_23_146_0<br>: Reasonable<br>vina: -10.029    | <br>title:<br>PHKG1_RABIT_6_296_ATPsite_0<br>: Unreasonable<br>vina: -10.937 | <br>title:<br>PHKG1_RABIT_6_296_ATPsite_0<br>: Reasonable<br>vina: -13.466 |
| <br>title: M3K14_HUMAN_321_678_0<br>: Unreasonable<br>vina: -8.948  | <br>title: M3K14_HUMAN_321_678_0<br>: Reasonable<br>vina: -9.001  | <br>title: M3K14_HUMAN_321_678_0<br>: Unreasonable<br>vina: -9.44            | <br>title: M3K14_HUMAN_321_678_0<br>: Reasonable<br>vina: -8.899           |
| <br>title: PTGIS_HUMAN_20_500_0<br>: Unreasonable<br>vina: -7.955   | <br>title: PTGIS_HUMAN_20_500_0<br>: Reasonable<br>vina: -9.193   | <br>title: PAC_ECOLX_27_846_0<br>: Unreasonable<br>vina: -7.907              | <br>title: PAC_ECOLX_27_846_0<br>: Reasonable<br>vina: -8.704              |
| <br>title: PAC_ECOLX_27_846_0<br>: Unreasonable<br>vina: -9.272     | <br>title: PAC_ECOLX_27_846_0<br>: Reasonable<br>vina: -9.421     | <br>title: TNKS2_HUMAN_948_1162_0<br>: Unreasonable<br>vina: -10.215         | <br>title: TNKS2_HUMAN_948_1162_0<br>: Reasonable<br>vina: -12.537         |
| <br>title: XANLY_BACGL_26_777_0<br>: Unreasonable<br>vina: -6.991 | <br>title: XANLY_BACGL_26_777_0<br>: Reasonable<br>vina: -8.994 | <br>title: PPIA_HUMAN_1_165_0<br>: Unreasonable<br>vina: -9.243            | <br>title: PPIA_HUMAN_1_165_0<br>: Reasonable<br>vina: -9.435            |
| <br>title: PPIA_HUMAN_1_165_0<br>: Unreasonable<br>vina: -7.765   | <br>title: PPIA_HUMAN_1_165_0<br>: Reasonable<br>vina: -8.447   | <br>title: P2Y12_HUMAN_1_342_0<br>: Unreasonable<br>vina: -8.744           | <br>title: P2Y12_HUMAN_1_342_0<br>: Reasonable<br>vina: -10.352          |

| Supporting molecule                                                                                                                                        | CIDD output                                                                                                                                              | Supporting molecule                                                                                                                                        | CIDD output                                                                                                                                               |
|------------------------------------------------------------------------------------------------------------------------------------------------------------|----------------------------------------------------------------------------------------------------------------------------------------------------------|------------------------------------------------------------------------------------------------------------------------------------------------------------|-----------------------------------------------------------------------------------------------------------------------------------------------------------|
| 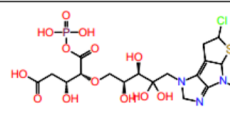 <p>title: P2Y12_HUMAN_1_342_0<br/>: Unreasonable<br/>vina: -8.31</p>     |  <p>title: P2Y12_HUMAN_1_342_0<br/>: Reasonable<br/>vina: -9.509</p>    |  <p>title: EXG1_CANAL_41_438_0<br/>: Unreasonable<br/>vina: -10.072</p>  |  <p>title: EXG1_CANAL_41_438_0<br/>: Reasonable<br/>vina: -10.17</p>   |
|  <p>title: MENE_BACSU_2_486_0<br/>: Unreasonable<br/>vina: -8.029</p>     |  <p>title: MENE_BACSU_2_486_0<br/>: Reasonable<br/>vina: -8.629</p>     |  <p>title: SQHC_ALIAD_1_631_0<br/>: Unreasonable<br/>vina: -9.519</p>    |  <p>title: SQHC_ALIAD_1_631_0<br/>: Reasonable<br/>vina: -12.291</p>   |
|  <p>title: CHIB_SERMA_1_499_0<br/>: Unreasonable<br/>vina: -7.389</p>     |  <p>title: CHIB_SERMA_1_499_0<br/>: Reasonable<br/>vina: -9.388</p>     |  <p>title: SIR3_HUMAN_117_398_0<br/>: Unreasonable<br/>vina: -10.258</p> |  <p>title: SIR3_HUMAN_117_398_0<br/>: Reasonable<br/>vina: -10.419</p> |
|  <p>title: DYRK2_HUMAN_145_550_0<br/>: Unreasonable<br/>vina: -7.898</p>  |  <p>title: DYRK2_HUMAN_145_550_0<br/>: Reasonable<br/>vina: -9.098</p>  |  <p>title: NOS3_HUMAN_65_480_0<br/>: Unreasonable<br/>vina: -9.821</p>   |  <p>title: NOS3_HUMAN_65_480_0<br/>: Reasonable<br/>vina: -10.535</p>  |
|  <p>title: NR1H4_HUMAN_258_486_0<br/>: Unreasonable<br/>vina: -8.974</p> |  <p>title: NR1H4_HUMAN_258_486_0<br/>: Reasonable<br/>vina: -9.969</p> |  <p>title: BACE2_HUMAN_76_460_0<br/>: Unreasonable<br/>vina: -9.302</p> |  <p>title: BACE2_HUMAN_76_460_0<br/>: Reasonable<br/>vina: -9.947</p> |
|  <p>title: BACE2_HUMAN_76_460_0<br/>: Unreasonable<br/>vina: -9.473</p> |  <p>title: BACE2_HUMAN_76_460_0<br/>: Reasonable<br/>vina: -9.828</p> |  <p>title: SDIA_ECOLI_1_171_0<br/>: Unreasonable<br/>vina: -8.889</p>  |  <p>title: SDIA_ECOLI_1_171_0<br/>: Reasonable<br/>vina: -13.779</p> |
|  <p>title: TRAR_RHIRD_1_234_0<br/>: Unreasonable<br/>vina: -10.182</p>  |  <p>title: TRAR_RHIRD_1_234_0<br/>: Reasonable<br/>vina: -13.112</p>  |  <p>title: TRAR_RHIRD_1_234_0<br/>: Unreasonable<br/>vina: -9.69</p>   |  <p>title: TRAR_RHIRD_1_234_0<br/>: Reasonable<br/>vina: -15.856</p> |

Supporting molecule

CIDD output

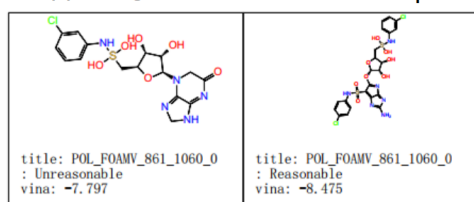

Supporting molecule

CIDD output

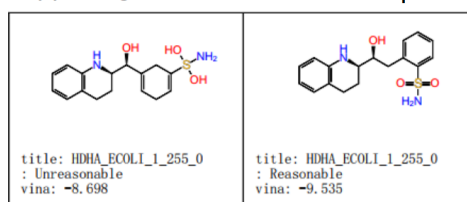

Supplement: supplementary_material [file suppl.pdf › suppl.pdf]
